# Supplementary material for: Methane Catalytic Combustion under Lean Conditions over Pristine and Ir-Loaded La1−xSrxMnO3 Perovskites: Efficiency, Hysteresis, and Time-on-Stream and Thermal Aging Stabilities
Source: MDPI journal article supplement (doi:10.3390/nano13152271), 2023-08-07
Supplement: s1 [file s1]

# Supplementary Material

## Methane Catalytic Combustion under Lean Conditions over Pristine and Ir-Loaded $\text{La}_{1-x}\text{Sr}_x\text{MnO}_3$ Perovskites: Efficiency, Hysteresis, and Time-On-Stream and Thermal Aging Stabilities

Catherine Drosou <sup>1,\*</sup>, Ersi Nikolaraki <sup>1</sup>, Theodora Georgakopoulou <sup>1</sup>, Sotiris Fanourgiakis <sup>1</sup>,  
Vassilios T. Zaspalis <sup>2,3</sup> and Ioannis V. Yentekakis <sup>1,4,\*</sup>

<sup>1</sup> Laboratory of Physical Chemistry & Chemical Processes, School of Chemical and Environmental Engineering, Technical University of Crete, 731 00 Chania, Crete, Greece; enikolaraki@tuc.gr (E.N.); theodorageorgakopoulou@gmail.com (T.G.); sfanourgiakis@tuc.gr (S.F.)

<sup>2</sup> Department of Chemical Engineering, Aristotle University of Thessaloniki, 541 24 Thessaloniki, Greece; zaspalis@auth.gr

<sup>3</sup> Chemical Process & Energy Resources Institute, Center for Research & Technology Hellas (CPERI/CERTH), 570 01 Thermi, Thessaloniki, Greece

<sup>4</sup> Institute of GeoEnergy, Foundation for Research and Technology-Hellas (FORTH/IG), 731 00 Chania, Greece

\* Correspondence: edrosou@tuc.gr (C.D.); igentekakis@tuc.gr (I.V.Y.)

## Supplementary Figures

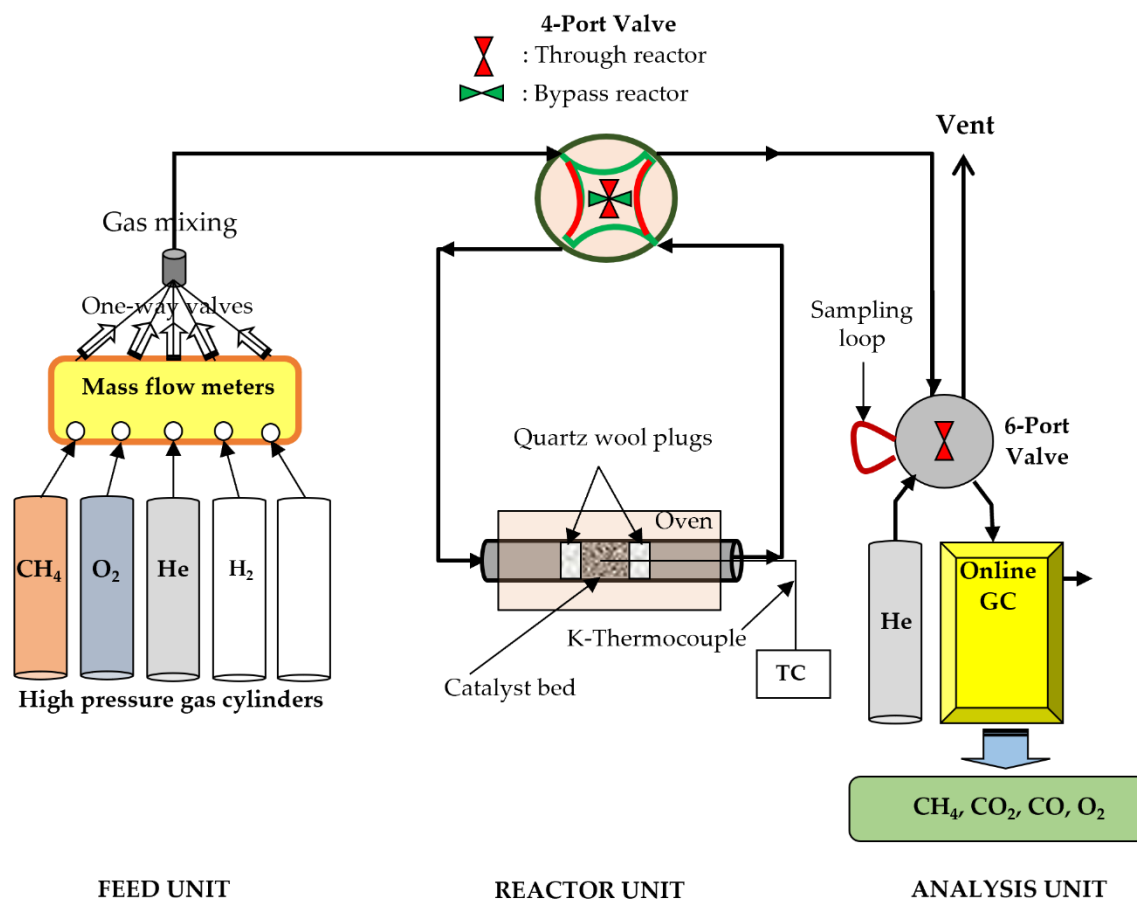

**Figure S1.** Schematic configuration of the continuous flow experimental apparatus equipped with on-line Gas Chromatography.

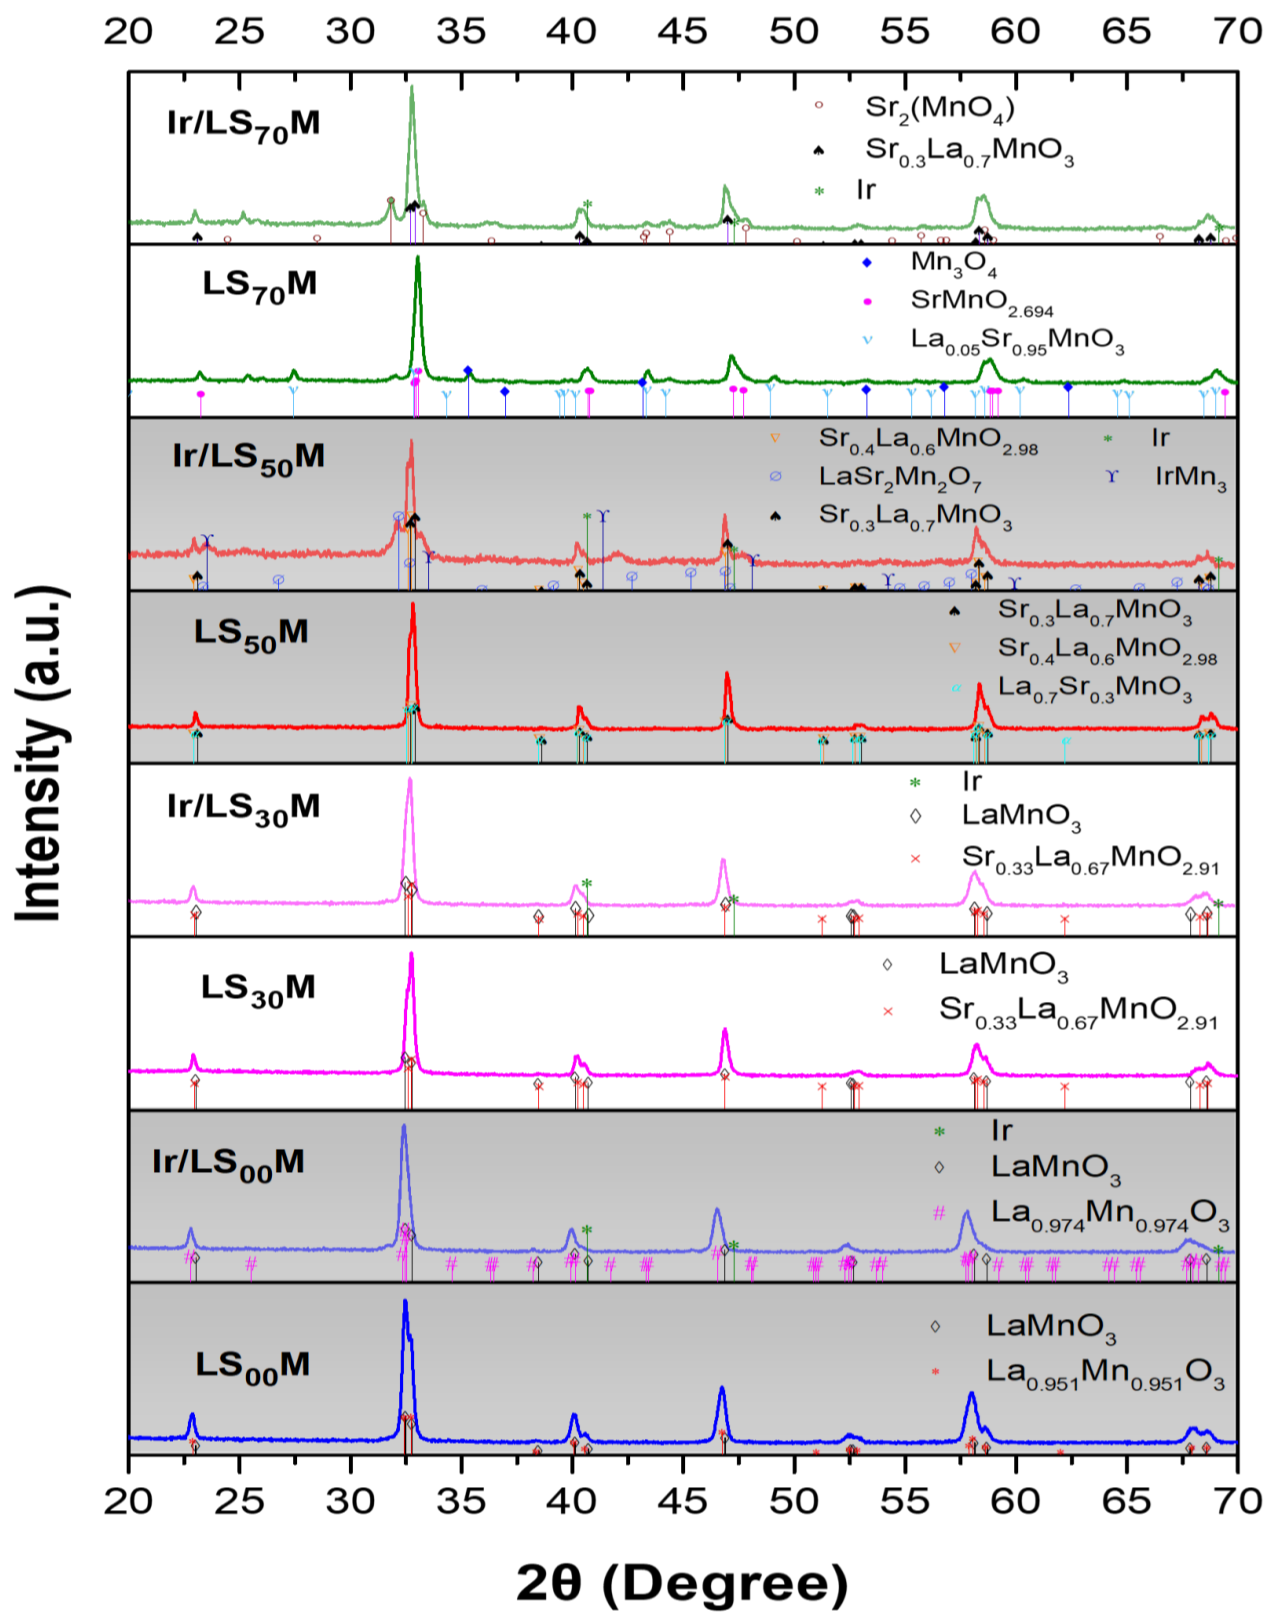

**Figure S2.** XRD patterns of LS<sub>x</sub>M perovskites ( $\text{La}_{1-x}\text{Sr}_x\text{MnO}_3$ ;  $x = 0, 30, 50$  and  $70\%$  substitution of La by Sr) and the corresponding 2 wt% Ir/LS<sub>x</sub>M catalysts.

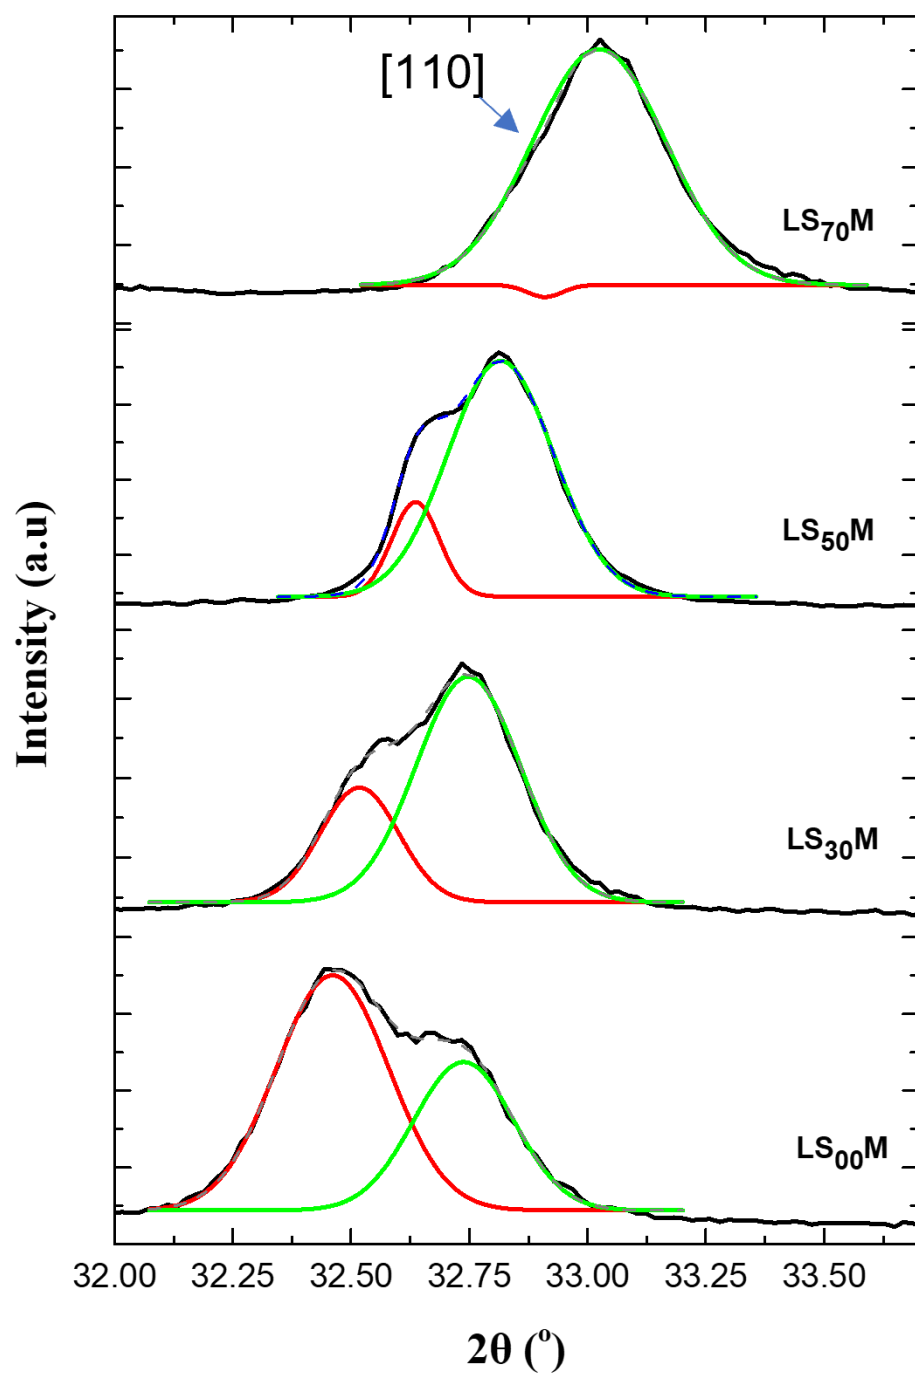

**Figure S3.** Magnification of the XRD patterns of LS<sub>x</sub>M perovskites at the region  $2\theta = 32 - 34^\circ$ , where the main peak of the perovskite phase appears.

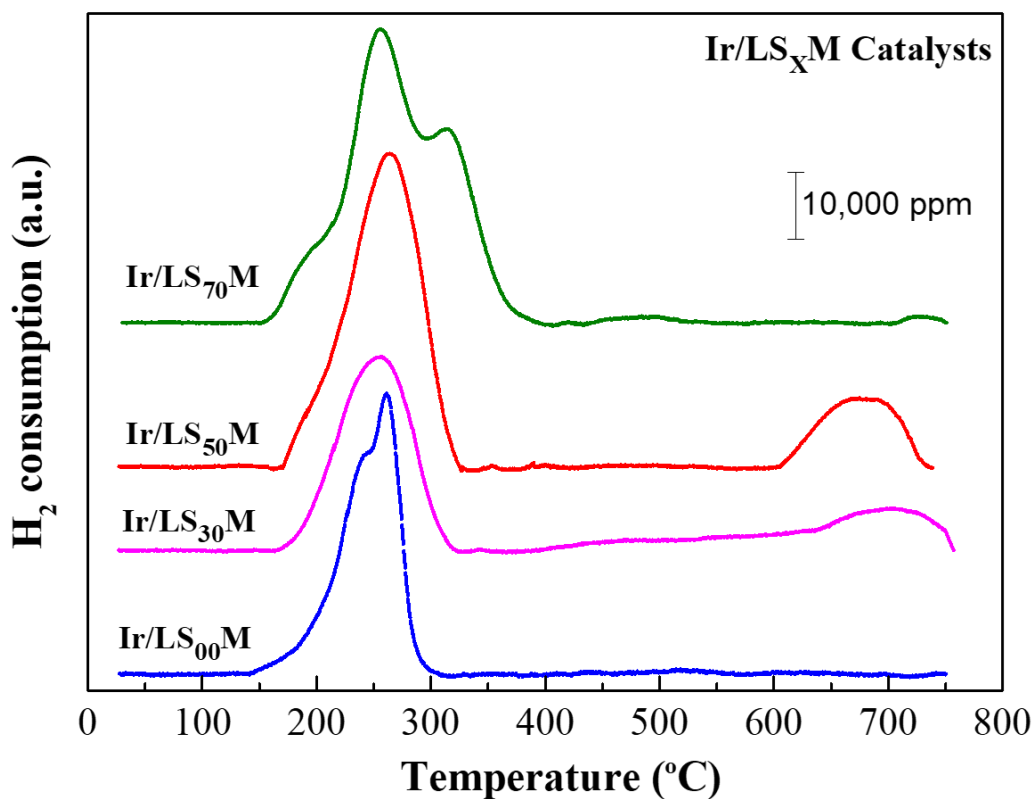

**Figure S4.** H<sub>2</sub> consumption versus temperature (H<sub>2</sub>-TPR profiles) of Ir/LS<sub>x</sub>M catalysts.

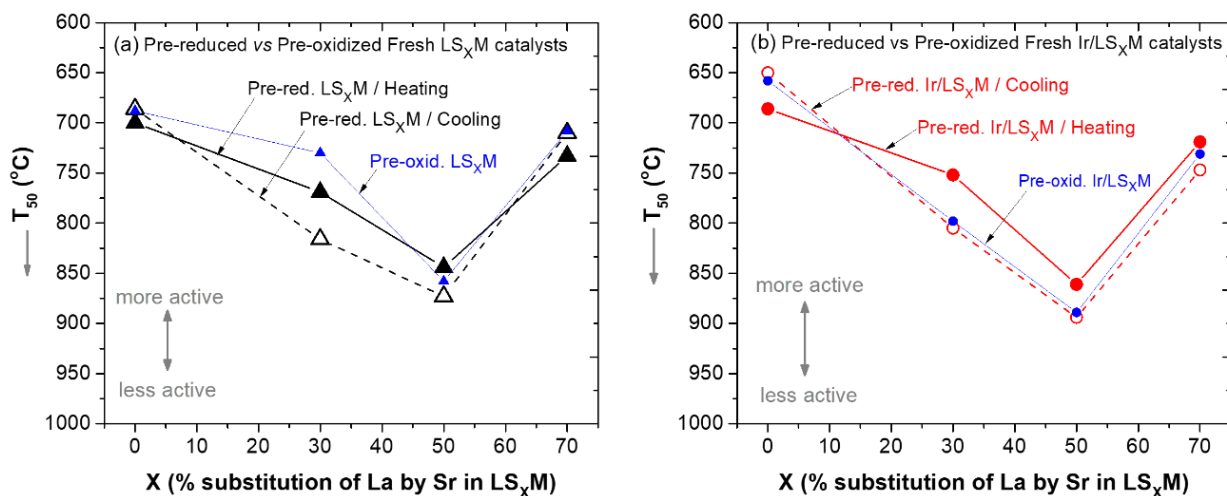

**Figure S5.** Dependence of  $T_{50}$  on  $X$  (% substitution of La by Sr in the perovskite composition) for pre-reduced and pre-oxidized LS<sub>x</sub>M catalysts (a), and pre-reduced and pre-oxidized Ir/LS<sub>x</sub>M catalysts (b). Feed conditions: 1.0% CH<sub>4</sub> + 5.0% O<sub>2</sub>, He balance at 1atm,  $F_r$ =75 mL/min,  $m_{cat}$  = 50 mg, WGHSV=90,000 mL/g·h.

## Supplementary Tables

**Table S1.** Temperature for 50% CH<sub>4</sub> conversion (T<sub>50</sub>) of pre-oxidized and pre-reduced, *fresh* LS<sub>x</sub>M and Ir/LS<sub>x</sub>M catalysts.

| Fresh Catalysts       | T <sub>50</sub> (°C) Pre-oxidized catalysts |                                | T <sub>50</sub> (°C) Pre-reduced catalysts |                                |
|-----------------------|---------------------------------------------|--------------------------------|--------------------------------------------|--------------------------------|
|                       | <i>Light-off<br/>(heating)</i>              | <i>Light-out<br/>(cooling)</i> | <i>Light-off (heating)</i>                 | <i>Light-out<br/>(cooling)</i> |
| LS <sub>00</sub> M    | 688                                         | 688                            | 700                                        | 686                            |
| LS <sub>30</sub> M    | 730                                         | 730                            | 769                                        | 816                            |
| LS <sub>50</sub> M    | 858                                         | 858                            | 844                                        | 873                            |
| LS <sub>70</sub> M    | 708                                         | 708                            | 733                                        | 710                            |
| Ir/LS <sub>00</sub> M | 658                                         | 658                            | 686                                        | 650                            |
| Ir/LS <sub>30</sub> M | 798                                         | 798                            | 752                                        | 805                            |
| Ir/LS <sub>50</sub> M | 889                                         | 889                            | 861                                        | 894                            |
| Ir/LS <sub>70</sub> M | 731                                         | 731                            | 719                                        | 747                            |

**Table S2.** Temperature for 50% CH<sub>4</sub> conversion (T<sub>50</sub>) of pre-reduced and pre-oxidized LS<sub>x</sub>M and Ir/LS<sub>x</sub>M catalysts that were aged at 750 °C.

| Aged@750 Catalysts    | T <sub>50</sub> (°C) Pre-oxidized catalysts |                                | T <sub>50</sub> (°C) Pre-reduced catalysts |                                |
|-----------------------|---------------------------------------------|--------------------------------|--------------------------------------------|--------------------------------|
|                       | <i>Light-off<br/>(heating)</i>              | <i>Light-out<br/>(cooling)</i> | <i>Light-off<br/>(heating)</i>             | <i>Light-out<br/>(cooling)</i> |
| LS <sub>00</sub> M    | 681                                         | 681                            | 699                                        | 687                            |
| LS <sub>30</sub> M    | 838                                         | 838                            | 813                                        | 840                            |
| LS <sub>50</sub> M    | 897                                         | 897                            | 877                                        | 898                            |
| LS <sub>70</sub> M    | 717                                         | 717                            | 737                                        | 727                            |
| Ir/LS <sub>00</sub> M | 657                                         | 657                            | 687                                        | 653                            |
| Ir/LS <sub>30</sub> M | 842                                         | 842                            | 769                                        | 830                            |
| Ir/LS <sub>50</sub> M | 912                                         | 912                            | 895                                        | 913                            |
| Ir/LS <sub>70</sub> M | 752                                         | 752                            | 715                                        | 751                            |
